# Supplementary material for: Beta-Cell Specific Deletion of Dicer1 Leads to Defective Insulin Secretion and Diabetes Mellitus
Source: PubMed Central journal article supplement (PMC3246465; doi:10.1371/journal.pone.0029166), 2011-12-27

**Figure S2**

**Control**

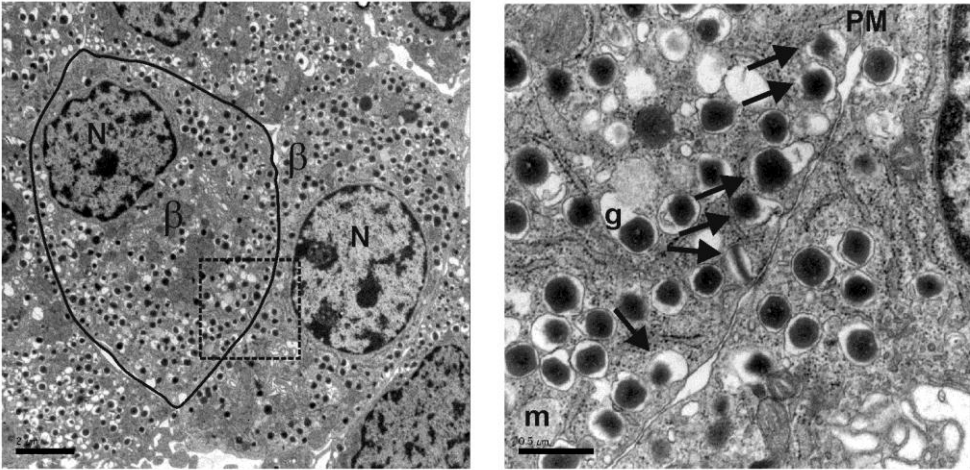

**RIP-Cre *Dicer1*<sup>ΔΔ</sup>**

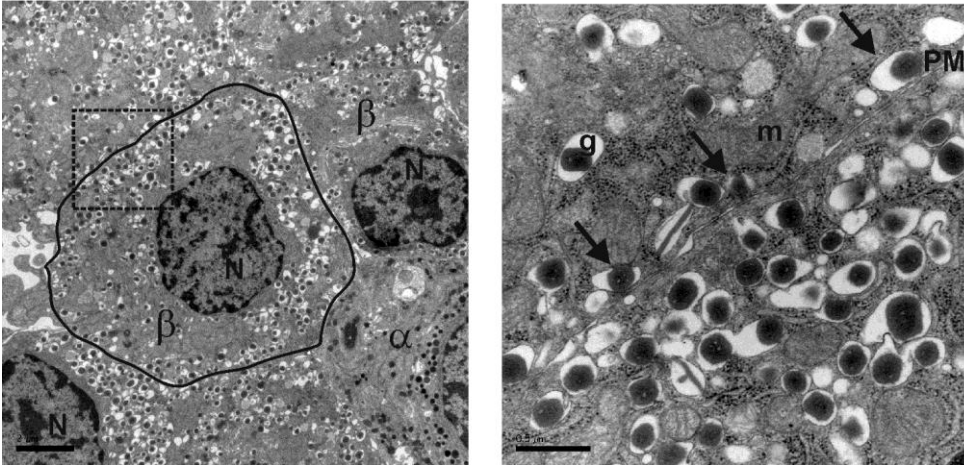

Supplement: pone.0029166.s002.pdf [file pone.0029166.s002.pdf]
