# Supplementary material for: Beta-Cell Specific Deletion of Dicer1 Leads to Defective Insulin Secretion and Diabetes Mellitus
Source: PubMed Central journal article supplement (PMC3246465; doi:10.1371/journal.pone.0029166), 2011-12-27

**Figure S3**

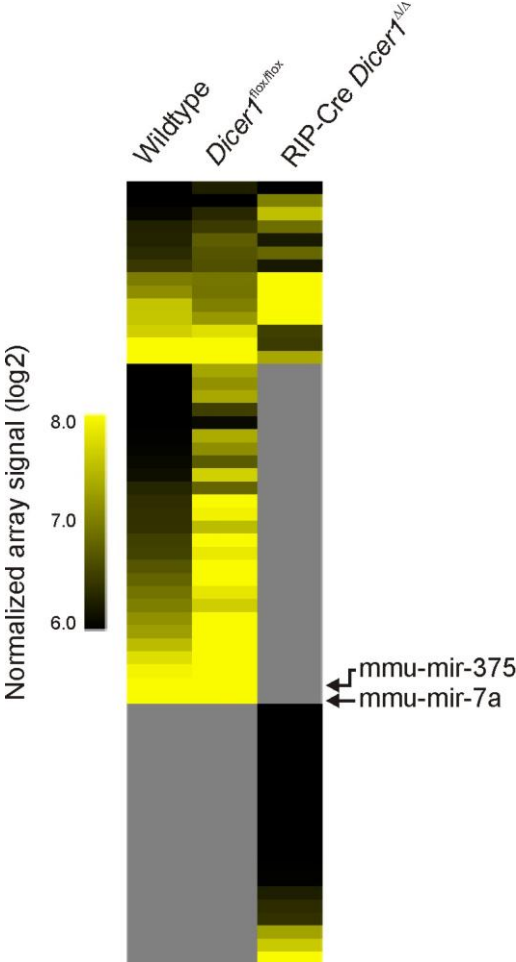

Supplement: pone.0029166.s003.pdf [file pone.0029166.s003.pdf]
